# Supplementary material for: Beverage Consumption and Longitudinal Changes in Lipoprotein Concentrations and Incident Dyslipidemia in US Adults: The Framingham Heart Study
Source: PubMed Central journal article supplement — J Am Heart Assoc. 2020 Feb 26;9(5):e014083. doi: 10.1161/JAHA.119.014083 (PMC7335580; doi:10.1161/jaha.119.014083), 2020-02-26
Supplement: JAH3-9-e014083-s001.pdf [file JAH3-9-e014083-s001.pdf]

# **Supplemental Material**

**Table S1. Mean difference in 4-year changes in lipid traits across beverage consumption groups by cohort\***

|                                              | Beverage Consumption Groups |                        |                       |                       |                    | <i>P</i> for trend |
|----------------------------------------------|-----------------------------|------------------------|-----------------------|-----------------------|--------------------|--------------------|
|                                              | <1 serving/<br>month        | 1-4 servings/<br>month | 1-2 servings/<br>week | 3-7 servings/<br>week | >1 serving/<br>day |                    |
| <b>Sugar-Sweetened Beverage Intake</b>       |                             |                        |                       |                       |                    |                    |
| Offspring Cohort                             |                             |                        |                       |                       |                    |                    |
| No of Observations                           | 3,497                       | 1,666                  | 1,321                 | 1,705                 | 674                |                    |
| LDL-C (mg/dl)                                | Reference                   | -0.6 (0.7)             | 1.2 (0.8)             | -0.004 (0.8)          | 0.9 (1.2)          | 0.44               |
| HDL-C (mg/dl)                                | Reference                   | -0.4 (0.3)             | -0.5 (0.3)            | -0.7 (0.3)            | -1.8 (0.4)         | 0.0002             |
| TG (mg/dl)                                   | Reference                   | 1.8 (1.8)              | 2.5 (2.0)             | 4.9 (1.9)             | 2.6 (2.9)          | 0.03               |
| Non-HDL-C (mg/dl)                            | Reference                   | -0.3 (0.8)             | -0.5 (0.9)            | 0.6 (0.9)             | 1.0 (1.3)          | 0.31               |
| Generation 3 Cohort                          |                             |                        |                       |                       |                    |                    |
| No of Observations                           | 867                         | 549                    | 483                   | 576                   | 325                |                    |
| LDL-C                                        | Reference                   | 0.3 (0.8)              | -0.3 (0.9)            | 1.2 (0.9)             | 2.4 (1.2)          | 0.08               |
| HDL-C (mg/dl)                                | Reference                   | -0.1 (0.4)             | -0.4 (0.4)            | -1.0 (0.4)            | -0.8 (0.5)         | 0.01               |
| TG (mg/dl)                                   | Reference                   | 4.5 (2.4)              | 2.8 (2.6)             | 5.6 (2.6)             | 10.8 (3.5)         | 0.006              |
| Non-HDL-C (mg/dl)                            | Reference                   | 0.8 (0.9)              | -0.6 (1.0)            | 1.6 (1.0)             | 3.6 (1.4)          | 0.02               |
| <b>Low-Calorie Sweetened Beverage Intake</b> |                             |                        |                       |                       |                    |                    |
| Offspring Cohort                             |                             |                        |                       |                       |                    |                    |
| No of Observations                           | 3,775                       | 1,112                  | 805                   | 1,890                 | 1,275              |                    |
| LDL-C (mg/dl)                                | Reference                   | 0.4 (0.8)              | 1.1 (0.9)             | -0.2 (0.7)            | 0.1 (0.8)          | 0.99               |
| HDL-C (mg/dl)                                | Reference                   | -0.6 (0.3)             | -0.3 (0.3)            | -0.5 (0.3)            | -0.6 (0.3)         | 0.03               |
| TG (mg/dl)                                   | Reference                   | 1.0 (2.0)              | 1.7 (2.3)             | 1.9 (1.7)             | 1.3 (2.0)          | 0.28               |
| Non-HDL-C (mg/dl)                            | Reference                   | 0.5 (0.9)              | 1.1 (1.0)             | 0.1 (0.8)             | 0.04 (0.9)         | 0.91               |
| Generation 3 Cohort                          |                             |                        |                       |                       |                    |                    |
| No of Observations                           | 1,242                       | 351                    | 287                   | 506                   | 414                |                    |
| LDL-C                                        | Reference                   | 0.5 (0.9)              | 0.3 (1.0)             | -0.2 (0.8)            | -1.7 (0.9)         | 0.12               |
| HDL-C (mg/dl)                                | Reference                   | 0.7 (0.4)              | -0.5 (0.4)            | -0.4 (0.3)            | -0.8 (0.4)         | 0.01               |
| TG (mg/dl)                                   | Reference                   | 4.4 (2.6)              | 4.3 (2.8)             | 3.5 (2.3)             | 0.2 (2.5)          | 0.40               |
| Non-HDL-C (mg/dl)                            | Reference                   | 0.5 (1.0)              | 0.2 (1.1)             | 0.2 (0.9)             | -2.0 (1.0)         | 0.17               |
| <b>100% Fruit Juice Intake</b>               |                             |                        |                       |                       |                    |                    |
| Offspring Cohort                             |                             |                        |                       |                       |                    |                    |
| No of Observations                           | 1,122                       | 991                    | 1,009                 | 3,644                 | 2,093              |                    |
| LDL-C (mg/dl)                                | Reference                   | 0.6 (1.0)              | 0.8 (1.0)             | -0.5 (0.8)            | -0.9 (0.9)         | 0.12               |
| HDL-C (mg/dl)                                | Reference                   | 0.2 (0.4)              | -0.3 (0.4)            | -0.6 (0.3)            | -0.2 (0.3)         | 0.11               |
| TG (mg/dl)                                   | Reference                   | 2.1 (2.5)              | -0.03 (2.5)           | 0.6 (2.0)             | -3.0 (2.3)         | 0.17               |
| Non-HDL-C (mg/dl)                            | Reference                   | 1.0 (1.1)              | 0.2 (1.2)             | -0.3 (0.9)            | -1.5 (1.0)         | 0.07               |
| Generation 3 Cohort                          |                             |                        |                       |                       |                    |                    |
| No of Observations                           | 307                         | 377                    | 547                   | 1,066                 | 503                |                    |
| LDL-C                                        | Reference                   | 0.2 (1.1)              | 0.4 (1.1)             | -0.8 (1.0)            | -0.6 (1.1)         | 0.27               |
| HDL-C (mg/dl)                                | Reference                   | 0.2 (0.5)              | -0.03 (0.5)           | 0.3 (0.4)             | 0.3 (0.5)          | 0.42               |
| TG (mg/dl)                                   | Reference                   | -1.0 (3.3)             | -3.9 (3.1)            | -4.4 (2.9)            | -6.0 (3.3)         | 0.04               |
| Non-HDL-C (mg/dl)                            | Reference                   | 0.9 (1.3)              | 1.3 (1.2)             | -0.7 (1.1)            | -0.9 (1.3)         | 0.11               |

HDL-C, high density lipoprotein cholesterol concentrations; LDL-C, low-density lipoprotein cholesterol concentrations; mg/dl, milligrams per deciliter; TC, total cholesterol concentrations; TG, triglyceride concentrations.

\*Framingham Offspring Cohort: 8,859 observations from 3,124 participants; Framingham Generation 3 Cohort: 2,800 participants. Values are beta-coefficients and standard errors for beverage intake in multivariate mixed effects models accounting for family structure and adjusted for age (continuous), sex (M/F), total energy (continuous), baseline for lipid trait (continuous), education (less than high school, graduated high school, some college, or graduated college), current smoking status (yes/no), current diabetes status (yes/no), physical activity index (continuous), alcohol (grams), use of LDL-lowering medication (yes/no; where applicable), servings per day of vegetables, whole fruits, whole grains, nuts/seeds, and seafood, as well as percent energy from saturated fat (continuous), change in waist circumference, and mutual adjustment for SSB, LCSB, and 100% fruit juice (categorical as continuous).

**Table S2. Difference in 4-year changes in lipid traits by SSB and LCSB category\*.**

| SSB Category    | LCSB Category   | Median SSB Intake (servings/week) | Median LCSB Intake (servings/week) | <i>n</i> | HDL-C (mg/dl)    | <i>p</i> | TG (mg/dl)       | <i>p</i> |
|-----------------|-----------------|-----------------------------------|------------------------------------|----------|------------------|----------|------------------|----------|
|                 |                 |                                   |                                    |          | $\beta \pm SE$   |          | $\beta \pm SE$   |          |
| <1 serv/ month  | <1 serv/ month  | 0.1                               | 0.0                                | 1,561    | <b>Reference</b> |          | <b>Reference</b> |          |
|                 | 1-10 serv/month | 0.1                               | 1.3                                | 885      | -0.2 (0.3)       | 0.54     | 0.4 (2.2)        | 0.84     |
|                 | >3 serv/week    | 0.1                               | 7.1                                | 1,913    | -0.5 (0.3)       | 0.08     | 0.8 (1.8)        | 0.66     |
| 1-10 serv/month | <1 serv/ month  | 1.2                               | 0.0                                | 1,730    | -0.2 (0.3)       | 0.42     | 0.3 (1.9)        | 0.86     |
|                 | 1-10 serv/month | 1.1                               | 1.1                                | 1,031    | -0.8 (0.3)       | 0.02     | 3.7 (2.2)        | 0.08     |
|                 | >3 serv/week    | 1.1                               | 6.2                                | 1,258    | -0.7 (0.3)       | 0.03     | 4.6 (2.1)        | 0.03     |
| >3 serv/week    | <1 serv/ month  | 5.5                               | 0.0                                | 1,726    | -0.9 (0.3)       | 0.004    | 4.8 (2.0)        | 0.02     |
|                 | 1-10 serv/month | 4.5                               | 1.2                                | 639      | -1.0 (0.4)       | 0.02     | 5.4 (2.6)        | 0.04     |
|                 | >3 serv/week    | 4.4                               | 6.2                                | 914      | -1.6 (0.4)       | <0.0001  | 4.3 (2.4)        | 0.07     |

HDL-C, high density lipoprotein cholesterol concentrations; LDL-C, low-density lipoprotein cholesterol concentrations; mg/dl, milligrams per deciliter; serv, serving(s); TC, total cholesterol concentrations; TG, triglyceride concentrations.

\*Framingham Offspring Cohort: 8,857 observations from 3,124 participants; Framingham Generation 3 Cohort: 2,800 participants. Values are pooled beta-coefficients for beverage intake in multivariate mixed effects models accounting for family structure and adjusted for age (continuous), sex (M/F), total energy (continuous), baseline for lipid trait (continuous), education (less than high school, graduated high school, some college, or graduated college), current smoking status (yes/no), current diabetes status (yes/no), physical activity index (continuous), alcohol (grams), use of LDL-lowering medication (yes/no; where applicable), change in waist circumference (continuous), servings per day of vegetables, whole fruits, whole grains, nuts/seeds, and seafood, as well as percent energy from saturated fat (continuous) and mutual adjustment for SSB, LCSB, and 100% fruit juice (categorical as continuous).

**Table S3. HRs (95% CIs) for incident dyslipidemia according to recent beverage consumption category (Framingham Offspring Cohort)\***

|                                                                       | SSB Intake     |              |                          | LCSB Intake    |              |                           | 100% Fruit Juice Intake |              |                         |
|-----------------------------------------------------------------------|----------------|--------------|--------------------------|----------------|--------------|---------------------------|-------------------------|--------------|-------------------------|
|                                                                       | Incident Cases | Person-Years | HR (95% CI)              | Incident Cases | Person-Years | HR (95% CI)               | Incident Cases          | Person-Years | HR (95% CI)             |
| <b>Incidence of high LDL-C (<math>\geq 160</math> mg/dl)</b>          |                |              |                          |                |              |                           |                         |              |                         |
| <1 serving/month                                                      | 394            | 9956         | Reference                | 419            | 11653        | Reference                 | 129                     | 3290         | Reference               |
| 1-4 servings/month                                                    | 216            | 6190         | 0.99 (0.84-1.17)         | 138            | 3830         | 1.00 (0.83-1.20)          | 162                     | 4011         | 1.13 (0.90-1.40)        |
| 1-2 servings/week                                                     | 70             | 2239         | 0.98 (0.76-1.28)         | 42             | 1336         | 0.85 (0.63-1.15)          | 67                      | 2009         | 0.94 (0.70-1.26)        |
| 3-7 servings/week                                                     | 206            | 5010         | 1.22 (1.01-1.47)         | 216            | 5162         | 1.17 (0.99-1.39)          | 376                     | 10091        | 0.98 (0.81-1.20)        |
| >1 serving/day                                                        | 75             | 2044         | 1.19 (0.88-1.59)         | 144            | 3428         | 1.27 (1.05-1.53)          | 227                     | 6033         | 1.08 (0.86-1.36)        |
|                                                                       |                |              | $p_{\text{trend}}=0.05$  |                |              | $p_{\text{trend}}=0.01$   |                         |              | $p_{\text{trend}}=0.94$ |
| <b>Incidence of low HDL-C (Women: &lt;50 mg/dl; Men &lt;40 mg/dl)</b> |                |              |                          |                |              |                           |                         |              |                         |
| <1 serving/month                                                      | 108            | 9784         | Reference                | 124            | 10481        | Reference                 | 45                      | 3221         | Reference               |
| 1-4 servings/month                                                    | 90             | 5610         | 1.47 (1.11-1.95)         | 51             | 3495         | 1.18 (0.85-1.63)          | 45                      | 3579         | 0.83 (0.55-1.25)        |
| 1-2 servings/week                                                     | 29             | 2030         | 1.24 (0.80-1.92)         | 9              | 1240         | 0.54 (0.25-1.13)          | 20                      | 1804         | 0.63 (0.38-1.07)        |
| 3-7 servings/week                                                     | 63             | 4064         | 1.43 (1.02-2.01)         | 85             | 4823         | 1.38 (1.04-1.84)          | 135                     | 9064         | 0.96 (0.67-1.37)        |
| >1 serving/day                                                        | 28             | 1396         | 1.98 (1.20-3.28)         | 49             | 2809         | 1.32 (0.92-1.88)          | 74                      | 5215         | 0.87 (0.58-1.30)        |
|                                                                       |                |              | $p_{\text{trend}}=0.01$  |                |              | $p_{\text{trend}}=0.05$   |                         |              | $p_{\text{trend}}=0.98$ |
| <b>Incidence of high TG (<math>\geq 175</math> mg/dl)</b>             |                |              |                          |                |              |                           |                         |              |                         |
| <1 serving/month                                                      | 167            | 11515        | Reference                | 194            | 12684        | Reference                 | 59                      | 3971         | Reference               |
| 1-4 servings/month                                                    | 99             | 6784         | 1.03 (0.80-1.31)         | 65             | 4263         | 1.04 (0.77-1.39)          | 75                      | 4398         | 1.15 (0.82-1.63)        |
| 1-2 servings/week                                                     | 49             | 2427         | 1.50 (1.07-2.10)         | 35             | 1534         | 1.43 (0.99-2.04)          | 44                      | 2184         | 1.24 (0.83-1.84)        |
| 3-7 servings/week                                                     | 98             | 5097         | 1.42 (1.07-1.88)         | 93             | 5724         | 1.07 (0.83-1.37)          | 179                     | 10823        | 1.14 (0.83-1.56)        |
| >1 serving/day                                                        | 43             | 1937         | 1.53 (1.01-2.31)         | 68             | 3534         | 1.18 (0.88-1.59)          | 99                      | 6384         | 1.06 (0.74-1.52)        |
|                                                                       |                |              | $p_{\text{trend}}=0.004$ |                |              | $p_{\text{trend}}=0.23$   |                         |              | $p_{\text{trend}}=0.84$ |
| <b>Incidence of high Non-HDL-C (<math>\geq 190</math> mg/dl)</b>      |                |              |                          |                |              |                           |                         |              |                         |
| <1 serving/month                                                      | 402            | 10351        | Reference                | 404            | 11864        | Reference                 | 145                     | 3435         | Reference               |
| 1-4 servings/month                                                    | 222            | 6298         | 1.02 (0.87-1.20)         | 144            | 3895         | 1.12 (0.93-1.34)          | 159                     | 4110         | 0.99 (0.81-1.23)        |
| 1-2 servings/week                                                     | 82             | 2367         | 1.11 (0.87-1.42)         | 47             | 1402         | 0.98 (0.73-1.30)          | 65                      | 2080         | 0.84 (0.63-1.12)        |
| 3-7 servings/week                                                     | 193            | 5021         | 1.16 (0.96-1.41)         | 223            | 5352         | 1.26 (1.07-1.49)          | 386                     | 10335        | 0.92 (0.77-1.12)        |
| >1 serving/day                                                        | 75             | 2065         | 1.17 (0.87-1.57)         | 155            | 3565         | 1.40 (1.17-1.69)          | 220                     | 6141         | 0.95 (0.77-1.18)        |
|                                                                       |                |              | $p_{\text{trend}}=0.10$  |                |              | $p_{\text{trend}}=0.0002$ |                         |              | $p_{\text{trend}}=0.49$ |

HDL-C, high density lipoprotein cholesterol concentrations; LDL-C, low-density lipoprotein cholesterol concentrations; mg/dl, milligrams per deciliter; TG, total cholesterol concentrations; TG, triglyceride concentrations.

---

Participants were free of dyslipidemia at baseline (according to each definition), thus sample sizes were as follows LDL-C (n=2,161), HDL-C (n=1,703), TG (n=2,116), and non-HDL-C (n=2,205).

\*Models adjusted for age (continuous), sex (M/F), total energy (continuous), education (less than high school, graduated high school, some college, or graduated college), current smoking status (yes/no), physical activity index (continuous), body mass index (BMI), alcohol (grams), servings per day of vegetables, whole fruits, whole grains, nuts/seeds, and seafood, as well as percent energy from saturated fat (continuous) and mutual adjustment for SSB, LCSB, and 100% fruit juice (categorical as continuous).

---

**Table S4. HRs (95% CIs) for incident dyslipidemia according to cumulative beverage consumption category (Framingham Offspring Cohort)\***

|                                                                      | SSB Intake     |              |                         | LCSB Intake    |              |                         | 100% Fruit Juice Intake |              |                         |
|----------------------------------------------------------------------|----------------|--------------|-------------------------|----------------|--------------|-------------------------|-------------------------|--------------|-------------------------|
|                                                                      | Incident Cases | Person-Years | HR (95% CI)             | Incident Cases | Person-Years | HR (95% CI)             | Incident Cases          | Person-Years | HR (95% CI)             |
| <b>Incidence of high LDL-C (<math>\geq 160</math> mg/dl)</b>         |                |              |                         |                |              |                         |                         |              |                         |
| <1 serving/month                                                     | 288            | 7665         | Reference               | 355            | 9585         | Reference               | 66                      | 1680         | Reference               |
| 1-4 servings/month                                                   | 189            | 4852         | 1.01 (0.84-1.22)        | 100            | 3165         | 0.75 (0.60-0.93)        | 82                      | 2331         | 0.78 (0.56-1.07)        |
| 1-2 servings/week                                                    | 180            | 5172         | 0.92 (0.75-1.11)        | 109            | 2944         | 0.82 (0.66-1.01)        | 142                     | 3767         | 0.75 (0.56-1.01)        |
| 3-7 servings/week                                                    | 223            | 5615         | 1.05 (0.87-1.28)        | 231            | 5856         | 0.93 (0.77-1.11)        | 415                     | 10463        | 0.83 (0.63-1.08)        |
| >1 serving/day                                                       | 81             | 2138         | 1.11 (0.84-1.47)        | 166            | 3891         | 1.00 (0.82-1.21)        | 256                     | 7202         | 0.79 (0.59-1.05)        |
|                                                                      |                |              | $p_{\text{trend}}=0.61$ |                |              | $p_{\text{trend}}=0.94$ |                         |              | $p_{\text{trend}}=0.47$ |
| <b>Incidence of low HDL-C (Women &lt;50 mg/dl; Men &lt;40 mg/dl)</b> |                |              |                         |                |              |                         |                         |              |                         |
| <1 serving/month                                                     | 95             | 7487         | Reference               | 108            | 8422         | Reference               | 27                      | 1559         | Reference               |
| 1-4 servings/month                                                   | 55             | 4531         | 0.91 (0.65-1.27)        | 45             | 2962         | 1.06 (0.74-1.51)        | 23                      | 1992         | 0.69 (0.39-1.22)        |
| 1-2 servings/week                                                    | 63             | 4662         | 1.03 (0.74-1.44)        | 35             | 2725         | 0.90 (0.59-1.37)        | 43                      | 3415         | 0.72 (0.43-1.19)        |
| 3-7 servings/week                                                    | 76             | 4760         | 1.17 (0.84-1.63)        | 80             | 5445         | 1.04 (0.77-1.40)        | 134                     | 9601         | 0.81 (0.52-1.25)        |
| >1 serving/day                                                       | 30             | 1447         | 1.57 (0.97-2.54)        | 51             | 3333         | 1.06 (0.74-1.52)        | 92                      | 6320         | 0.87 (0.54-1.39)        |
|                                                                      |                |              | $p_{\text{trend}}=0.09$ |                |              | $p_{\text{trend}}=0.79$ |                         |              | $p_{\text{trend}}=0.88$ |
| <b>Incidence of high TG (<math>\geq 175</math> mg/dl)</b>            |                |              |                         |                |              |                         |                         |              |                         |
| <1 serving/month                                                     | 130            | 8713         | Reference               | 156            | 10308        | Reference               | 36                      | 2037         | Reference               |
| 1-4 servings/month                                                   | 81             | 5336         | 1.03 (0.77-1.37)        | 55             | 3517         | 1.01 (0.73-1.39)        | 50                      | 2522         | 1.18 (0.77-1.82)        |
| 1-2 servings/week                                                    | 92             | 5717         | 1.10 (0.83-1.46)        | 60             | 3310         | 1.14 (0.83-1.56)        | 62                      | 4064         | 0.96 (0.62-1.49)        |
| 3-7 servings/week                                                    | 109            | 5984         | 1.25 (0.94-1.68)        | 116            | 6563         | 1.12 (0.87-1.45)        | 192                     | 11369        | 1.07 (0.72-1.58)        |
| >1 serving/day                                                       | 45             | 2019         | 1.52 (1.03-2.25)        | 70             | 4070         | 1.03 (0.76-1.39)        | 117                     | 7776         | 1.00 (0.65-1.54)        |
|                                                                      |                |              | $p_{\text{trend}}=0.03$ |                |              | $p_{\text{trend}}=0.51$ |                         |              | $p_{\text{trend}}=0.82$ |
| <b>Incidence of high Non-HDL-C (<math>\geq 3.5</math>)</b>           |                |              |                         |                |              |                         |                         |              |                         |
| <1 serving/month                                                     | 301            | 7989         | Reference               | 345            | 9762         | Reference               | 71                      | 1736         | Reference               |
| 1-4 servings/month                                                   | 188            | 4976         | 0.98 (0.81-1.18)        | 104            | 3209         | 0.82 (0.66-1.04)        | 84                      | 2360         | 0.76 (0.56-1.05)        |
| 1-2 servings/week                                                    | 179            | 5286         | 0.90 (0.74-1.09)        | 106            | 3029         | 0.83 (0.66-1.03)        | 137                     | 3867         | 0.68 (0.51-0.92)        |
| 3-7 servings/week                                                    | 227            | 5672         | 1.07 (0.88-1.30)        | 248            | 6079         | 1.03 (0.87-1.23)        | 423                     | 10745        | 0.79 (0.61-1.04)        |
| >1 serving/day                                                       | 80             | 2186         | 1.07 (0.81-1.41)        | 172            | 4031         | 1.09 (0.90-1.32)        | 260                     | 7402         | 0.75 (0.56-1.00)        |
|                                                                      |                |              | $p_{\text{trend}}=0.58$ |                |              | $p_{\text{trend}}=0.31$ |                         |              | $p_{\text{trend}}=0.34$ |

HDL-C, high density lipoprotein cholesterol concentrations; LDL-C, low-density lipoprotein cholesterol concentrations; mg/dl, milligrams per deciliter; TC, total cholesterol concentrations; TG, triglyceride concentrations.

---

Participants were free of dyslipidemia at baseline (according to each definition), thus sample sizes were as follows LDL-C (n=2,161), HDL-C (n=1,703), TG (n=2,116), and non-HDL-C (n=2,205).

\*Models adjusted for age (continuous), sex (M/F), total energy (continuous), education (less than high school, graduated high school, some college, or graduated college), current smoking status (yes/no), physical activity index (continuous), body mass index (BMI), alcohol (grams), servings per day of vegetables, whole fruits, whole grains, nuts/seeds, and seafood, as well as percent energy from saturated fat (continuous) and mutual adjustment for SSB, LCSB, and 100% fruit juice (categorical as continuous).

---

**Table S5. HRs (95% CIs) for incident dyslipidemia according to recent beverage consumption category (Framingham Generation 3 Cohort)\***

|                                                                                                | SSB Intake     |              |                         | LCSB Intake    |              |                         | 100% Fruit Juice Intake |              |                         |
|------------------------------------------------------------------------------------------------|----------------|--------------|-------------------------|----------------|--------------|-------------------------|-------------------------|--------------|-------------------------|
|                                                                                                | Incident Cases | Person-Years | HR (95% CI)             | Incident Cases | Person-Years | HR (95% CI)             | Incident Cases          | Person-Years | HR (95% CI)             |
| <b>Incidence of high LDL-C (<math>\geq 160</math> mg/dl)</b>                                   |                |              |                         |                |              |                         |                         |              |                         |
| <1 serving/month                                                                               | 81             | 4261         | Reference               | 118            | 6909         | Reference               | 33                      | 1627         | Reference               |
| 1-4 servings/month                                                                             | 47             | 3613         | 0.76 (0.53-1.09)        | 31             | 2275         | 0.84 (0.57-1.26)        | 52                      | 2667         | 0.82 (0.52-1.32)        |
| 1-2 servings/week                                                                              | 30             | 1764         | 1.15 (0.72-1.83)        | 12             | 705          | 1.14 (0.58-2.22)        | 27                      | 2078         | 0.72 (0.42-1.24)        |
| 3-7 servings/week                                                                              | 56             | 3046         | 1.18 (0.80-1.73)        | 50             | 2597         | 1.17 (0.83-1.64)        | 77                      | 5081         | 0.69 (0.44-1.08)        |
| >1 serving/day                                                                                 | 30             | 1872         | 1.04 (0.61-1.76)        | 33             | 2064         | 0.82 (0.53-1.28)        | 55                      | 3102         | 0.87 (0.53-1.44)        |
|                                                                                                |                |              | $p_{\text{trend}}=0.32$ |                |              | $p_{\text{trend}}=0.92$ |                         |              | $p_{\text{trend}}=0.45$ |
| <b>Incidence of low HDL-C (Women:<math>&lt;50</math> mg/dl; Men <math>&lt;40</math> mg/dl)</b> |                |              |                         |                |              |                         |                         |              |                         |
| <1 serving/month                                                                               | 25             | 3851         | Reference               | 44             | 6010         | Reference               | 14                      | 1495         | Reference               |
| 1-4 servings/month                                                                             | 27             | 3316         | 1.15 (0.64-2.05)        | 13             | 1930         | 0.87 (0.44-1.70)        | 17                      | 2322         | 0.67 (0.30-1.47)        |
| 1-2 servings/week                                                                              | 15             | 1555         | 1.15 (0.54-2.46)        | 5              | 617          | 1.27 (0.44-3.64)        | 24                      | 1806         | 1.42 (0.69-2.93)        |
| 3-7 servings/week                                                                              | 28             | 2548         | 1.55 (0.81-2.95)        | 25             | 2324         | 1.33 (0.78-2.28)        | 35                      | 4363         | 0.88 (0.43-1.79)        |
| >1 serving/day                                                                                 | 14             | 1461         | 1.07 (0.42-2.72)        | 23             | 1851         | 1.55 (0.89-2.72)        | 20                      | 2753         | 0.85 (0.39-1.86)        |
|                                                                                                |                |              | $p_{\text{trend}}=0.44$ |                |              | $p_{\text{trend}}=0.09$ |                         |              | $p_{\text{trend}}=0.88$ |
| <b>Incidence of high TG (<math>\geq 175</math> mg/dl)</b>                                      |                |              |                         |                |              |                         |                         |              |                         |
| <1 serving/month                                                                               | 48             | 4394         | Reference               | 73             | 7026         | Reference               | 21                      | 1739         | Reference               |
| 1-4 servings/month                                                                             | 35             | 3690         | 0.89 (0.56-1.43)        | 32             | 2267         | 1.24 (0.81-1.90)        | 39                      | 2767         | 1.01 (0.56-1.81)        |
| 1-2 servings/week                                                                              | 21             | 1806         | 0.92 (0.53-1.62)        | 10             | 765          | 1.41 (0.72-2.77)        | 27                      | 2091         | 1.08 (0.59-1.97)        |
| 3-7 servings/week                                                                              | 40             | 3090         | 1.04 (0.63-1.72)        | 31             | 2579         | 1.18 (0.75-1.86)        | 52                      | 5111         | 0.80 (0.46-1.42)        |
| >1 serving/day                                                                                 | 32             | 1843         | 1.49 (0.83-2.69)        | 30             | 2187         | 1.00 (0.62-1.61)        | 37                      | 3121         | 1.00 (0.55-1.83)        |
|                                                                                                |                |              | $p_{\text{trend}}=0.30$ |                |              | $p_{\text{trend}}=0.77$ |                         |              | $p_{\text{trend}}=0.64$ |
| <b>Incidence of high Non-HDL-C (<math>\geq 190</math> mg/dl)</b>                               |                |              |                         |                |              |                         |                         |              |                         |
| <1 serving/month                                                                               | 76             | 4269         | Reference               | 117            | 6988         | Reference               | 31                      | 1659         | Reference               |
| 1-4 servings/month                                                                             | 48             | 3648         | 0.86 (0.59-1.25)        | 31             | 2267         | 0.91 (0.61-1.35)        | 54                      | 2675         | 0.92 (0.57-1.47)        |
| 1-2 servings/week                                                                              | 29             | 1784         | 1.28 (0.80-2.04)        | 12             | 697          | 1.51 (0.80-2.85)        | 27                      | 2102         | 0.72 (0.42-1.23)        |
| 3-7 servings/week                                                                              | 54             | 3077         | 1.16 (0.78-1.72)        | 50             | 2633         | 1.25 (0.88-1.76)        | 85                      | 5168         | 0.76 (0.49-1.18)        |
| >1 serving/day                                                                                 | 43             | 1909         | 1.49 (0.92-2.42)        | 40             | 2103         | 1.01 (0.66-1.54)        | 53                      | 3091         | 0.80 (0.49-1.31)        |
|                                                                                                |                |              | $p_{\text{trend}}=0.09$ |                |              | $p_{\text{trend}}=0.46$ |                         |              | $p_{\text{trend}}=0.25$ |

HDL-C, high density lipoprotein cholesterol concentrations; LDL-C, low-density lipoprotein cholesterol concentrations; mg/dl, milligrams per deciliter; TC, total cholesterol concentrations; TG, triglyceride concentrations.



---

Participants were free of dyslipidemia at baseline (according to each definition), thus sample sizes were as follows LDL-C (n=2,377), HDL-C (n=2,084), TG (n=2,426), and non-HDL-C (n=2,400).

\*Models adjusted for age (continuous), sex (M/F), total energy (continuous), education (less than high school, graduated high school, some college, or graduated college), current smoking status (yes/no), physical activity index (continuous), body mass index (BMI), alcohol (grams), servings per day of vegetables, whole fruits, whole grains, nuts/seeds, and seafood, as well as percent energy from saturated fat (continuous) and mutual adjustment for SSB, LCSB, and 100% fruit juice (categorical as continuous).

---
